# Supplementary material for: XRCC1 deficient triple negative breast cancers are sensitive to ATR, ATM and Wee1 inhibitor either alone or in combination with olaparib
Source: PubMed Central journal article supplement — Ther Adv Med Oncol. 2020 Dec 21;12:1758835920974201. doi: 10.1177/1758835920974201 (PMC7758562; doi:10.1177/1758835920974201), 2020-12-21

## **Supplementary Methods**

### **Immunohistochemical staining of XRCC1, ATM, ATR, WEE1 and BRCA1 in clinical breast cancers**

The study was performed in a consecutive series of 1650 patients with primary invasive breast carcinomas who were diagnosed between 1986 and 1999 and entered into the Nottingham Tenovus Primary Breast Carcinoma series. All patients were treated in a single institution and have been investigated in a wide range of biomarker studies (9, 10, 19, 22, 23). Supplemental Table S1 summarizes patient demographics. All patients were treated in a uniform way in a single institution with standard surgery (mastectomy or wide local excision), followed by Radiotherapy. Prior to 1989, patients did not receive systemic adjuvant treatment (AT). After 1989, AT was scheduled based on prognostic and predictive factor status, including Nottingham Prognostic Index (NPI), oestrogen receptor- $\alpha$  (ER- $\alpha$ ) status, and menopausal status. Patients with NPI scores of  $<3.4$  (low risk) did not receive AT. In pre-menopausal patients with NPI scores of  $\geq 3.4$  (high risk), classical Cyclophosphamide, Methotrexate, and 5-Fluorouracil (CMF) chemotherapy was given; patients with ER- $\alpha$  positive tumours were also offered endocrine therapy. Postmenopausal patients with NPI scores of  $\geq 3.4$  and ER positivity were offered endocrine therapy, while ER negative patients received classical CMF chemotherapy. Median follow up was 111 months (range 1 to 233 months). Breast cancer specific survival (BCSS) data was maintained on a prospective basis. Breast cancer specific survival (BCSS) was defined as the number of months from diagnosis to the occurrence of BC related-death. Survival was censored if the patient was still alive at the time of analysis, lost to follow-up, or died from other causes.

**IHC protocol:** Immunohistochemical staining was performed using the Thermo Scientific Shandon Sequenza chamber system (REF: 72110017), in combination with the Novolink Max

Polymer Detection System (RE7280-K: 1250 tests), and the Leica Bond Primary Antibody Diluent (AR9352), each used according to the manufacturer's instructions (Leica Microsystems). Leica Autostainer XL machine was used to dewax and rehydrate the slides. Pre-treatment antigen retrieval was performed on the TMA sections using sodium citrate buffer (pH 6.0) and heated for 20 minutes at 95°C in a microwave (Whirlpool JT359 Jet Chef 1000W). Negative and positive (by omission of the primary antibody and IgG-matched serum) controls were included for each marker in each run. The negative control ensured that all the staining was produced from the specific interaction between antibody and antigen. HER2 expression was assessed according to the new ASCO/CAP guidelines using IHC and fluorescence in situ hybridisation (FISH) {Wolff, 2007 #19}. Supplementary Table S2 summarizes antigens, primary antibodies, clone, source and optimal dilution used for each immunohistochemical marker (XRCC1, ATM, ATR and WEE1).

**Evaluation of immune staining:** Whole field inspection of the core was scored and intensities of nuclear staining for DNA repair markers were grouped as follows: 0 = no staining, 1 = weak staining, 2 = moderate staining, 3 = strong staining. The percentage of each category was estimated (0-100%). H-score (range 0-300) was calculated by multiplying intensity of staining and percentage staining for ATR, WEE1 and XRCC1 expression. H-score of  $\geq 60$  was taken as the cut-off for high ATR expression. Low WEE1 expression was defined by H-score of  $\leq 100$ . Low/negative XRCC1 expression was defined by H-score of  $\leq 90$ . The percentage of ATM positive cells was used, with a cut off of  $<25\%$  cells being classed as low, and  $\geq 25\%$  as high for nuclear ATM protein level. For BRCA1, H score of less than 100 was considered as low/negative expression.

The Reporting Recommendations for Tumor Marker Prognostic Studies (REMARK) criteria, recommended by McShane et al (24), were followed throughout this study. This work was approved by Nottingham Research Ethics Committee.



**Supplementary Table S1:** Percentage of cells in various stages of the cell cycle.

| Cell line                              | G1<br>(Mean ±<br>SD*) | S phase<br>(Mean ±<br>SD*) | G2/M<br>(Mean ±<br>SD*) |
|----------------------------------------|-----------------------|----------------------------|-------------------------|
| MDA-MB-231 (C) _UT                     | 45 ± 0.8              | 44 ± 2.4                   | 8.4 ± 2.1               |
| MDA-MB-231(C) _Olaparib                | 39 ± 1.5              | 45 ± 0.5                   | 16 ± 1.4                |
| MDA-MB-231(C) _AZD6738                 | 38 ± 1.3              | 50 ± 5.4                   | 16.5 ± 4.8              |
| MDA-MB-231(C) _AZD6738+Olaparib        | 28.5 ± 1.2            | 50.5 ± 2.3                 | 12 ± 2.1                |
| MDA-MB-231(C) _AZD1775                 | 36 ± 4.3              | 47 ± 23                    | 17 ± 1.2                |
| MDA-MB-231(C) _AZD1775+Olaparib        | 37 ± 2.3              | 56.5 ± 5.6                 | 9.5 ± 3.5               |
| MDA-MB-231(C) _AZ31                    | 36 ± 1.6              | 46 ± 1.2                   | 21 ± 4.2                |
| MDA-MB-231(C) _AZ31+Olaparib           | 69.5 ± 3.1            | 28 ± 2.5                   | 1 ± 2.1                 |
|                                        |                       |                            |                         |
| MDA-MB-231 (XRCC1_KO) _UT              | 36 ± 2.1              | 46.5 ± 3.2                 | 17.5 ± 5.6              |
| MDA-MB-231(XRCC1_KO) _Olaparib         | 30 ± 4.5              | 24.5 ± 3.6                 | 43 ± 1.5                |
| MDA-MB-231(XRCC1_KO) _AZD6738          | 27 ± 1.8              | 64 ± 2.1                   | 11 ± 3.2                |
| MDA-MB-231(XRCC1_KO) _AZD6738+Olaparib | 22.5 ± 3.2            | 74 ± 6.2                   | 4 ± 1.4                 |
| MDA-MB-231(XRCC1_KO) _AZD1775          | 35 ± 2.6              | 59 ± 3.6                   | 6 ± 2.1                 |
| MDA-MB-231(XRCC1_KO) _AZD1775+Olaparib | 12 ± 3.1              | 82 ± 4.2                   | 7 ± 1.2                 |
| MDA-MB-231(XRCC1_KO) _AZ31             | 51.5 ± 2.1            | 35 ± 3.6                   | 5.8 ± 5.2               |
| MDA-MB-231(XRCC1_KO) _AZ31+Olaparib    | 72.5 ± 3.5            | 28.5 ± 2.5                 | 1.5 ± 0.8               |
|                                        |                       |                            |                         |
| MDA-MB-157 _UT                         | 45 ± 2.6              | 32 ± 1.8                   | 23 ± 3.8                |
| MDA-MB-157 _Olaparib                   | 33.5 ± 5.1            | 56.5 ± 4.9                 | 9.5 ± 3.5               |
| MDA-MB-157 _AZD6738                    | 49 ± 3.8              | 55 ± 7.2                   | 7 ± 6                   |
| MDA-MB-157 _AZD6738+Olaparib           | 24 ± 2.1              | 66 ± 2.3                   | 8.8 ± 4.5               |
| MDA-MB-157 _AZD1775                    | 37 ± 1.9              | 46 ± 3.1                   | 16.5 ± 3.5              |
| MDA-MB-157 _AZD1775+Olaparib           | 3 ± 2                 | 72 ± 3.2                   | 26 ± 8.4                |
| MDA-MB-157 _AZ31                       | 53 ± 4.2              | 43 ± 3.1                   | 2 ± 1.2                 |
| MDA-MB-157 _AZ31+Olaparib              | 69 ± 1.6              | 28 ± 5.1                   | 1 ± 3.2                 |
|                                        |                       |                            |                         |
| HeLa_control _UT                       | 49 ± 1.2              | 43 ± 1.5                   | 6.5 ± 1.6               |
| HeLa_control _Olaparib                 | 28 ± 4.2              | 51 ± 1.4                   | 12.5 ± 1.2              |
| HeLa_control _AZD6738                  | 38.5 ± 4.6            | 51 ± 6.2                   | 9.5 ± 2.1               |
| HeLa_control _AZD6738+Olaparib         | 41 ± 3.1              | 45 ± 2.4                   | 13 ± 1.6                |
| HeLa_control _AZD1775                  | 46 ± 3.1              | 48 ± 1.5                   | 4.8 ± 4                 |
| HeLa_control _AZD1775+Olaparib         | 38 ± 3.2              | 52 ± 1.4                   | 9 ± 2.8                 |
| HeLa_control _AZ31                     | 51 ± 1.6              | 39 ± 2.6                   | 8.5 ± 3.2               |
| HeLa_control _AZ31+Olaparib            | 40 ± 3.1              | 52 ± 5.1                   | 8 ± 4                   |
|                                        |                       |                            |                         |
| HeLa_XRCC1_KD _UT                      | 42 ± 1.3              | 44.5 ± 1.2                 | 12.5 ± 2.2              |
| HeLa_XRCC1_KD _Olaparib                | 24 ± 1.5              | 68 ± 1.8                   | 4 ± 2.1                 |
| HeLa_XRCC1_KD _AZD6738                 | 35 ± 2.4              | 59.5 ± 3.2                 | 5 ± 4.1                 |
| HeLa_XRCC1_KD _AZD6738+Olaparib        | 8 ± 7.8               | 65 ± 3.2                   | 25 ± 3.6                |
| HeLa_XRCC1_KD _AZD1775                 | 32 ± 2.4              | 53.5 ± 1.8                 | 15 ± 4.2                |
| HeLa_XRCC1_KD _AZD1775+Olaparib        | 16 ± 6.1              | 72 ± 3.6                   | 10 ± 2                  |
| HeLa_XRCC1_KD _AZ31                    | 59 ± 2.1              | 35 ± 4.2                   | 5 ± 1.2                 |
| HeLa_XRCC1_KD _AZ31+Olaparib           | 70 ± 2.6              | 22 ± 8.1                   | 8.5 ± 3.2               |

**Supplementary Table S2: Combination index for drug interaction**

| <b>Combination</b> | <b>Cell line</b>    | <b>Combination index</b> |
|--------------------|---------------------|--------------------------|
| AZD31 +Olaparib    | MDA-MB-231_XRCC1_KO | 0.62                     |
|                    | MDA-MB-157          | 0.75                     |
|                    | HeLa_KD             | 0.266                    |
| AZD6738+Olaparib   | MDA-MB-231_KO       | 0.225                    |
|                    | MDA-MB-157          | 0.162                    |
|                    | HeLa_XRCC1_KD       | 0.52                     |
| AZD1775+Olaparib   | 231_KO              | 0.25                     |
|                    | MDA-MB-157          | 0.9                      |
|                    | HeLa_XRCC1_KD       | 0.5                      |

**Supplementary Table S3: Clinicopathological characteristics of whole breast cancer cohort**

| <b>Variable</b>                  | <b>n*</b> | <b>Cases</b> | <b>(%)</b> |
|----------------------------------|-----------|--------------|------------|
| <b><u>Menopausal status</u></b>  | 1650      |              |            |
| Pre-menopausal                   |           | 612          | (37.0)     |
| postmenopausal                   |           | 1038         | (63.0)     |
| <b><u>Tumour Grade (NGS)</u></b> | 1650      |              |            |
| G1                               |           | 306          | (18.5)     |
| G2                               |           | 531          | (32.2)     |
| G3                               |           | 813          | (49.3)     |
| <b><u>Lymph node stage</u></b>   | 1650      |              |            |
| Negative                         |           | 1056         | (64.0)     |
| Positive (1-3 nodes)             |           | 486          | (29.5)     |
| Positive (>3 nodes)              |           | 108          | (6.5)      |
| <b><u>Tumour size (cm)</u></b>   | 1650      |              |            |
| T1 a + b ( $\leq 1.0$ )          |           | 187          | (11.0)     |
| T1 c ( $>1.0 - 2.0$ )            |           | 868          | (53.0)     |
| T2 ( $>2.0 - 5$ )                |           | 5729         | (35.0)     |
| T3 ( $>5$ )                      |           | 16           | (1.0)      |
| <b><u>Tumour type</u></b>        | 1650      |              |            |
| IDC-NST                          |           | 941          | (57)       |
| Tubular                          |           | 349          | (21)       |
| ILC                              |           | 160          | (10)       |
| Medullary (typical/atypical)     |           | 41           | (2.5)      |
| Others                           |           | 159          | (9.5)      |
| <b><u>NPI subgroups</u></b>      | 1650      |              |            |
| Excellent PG(2.08-2.40)          | Low risk  | 207          | (12.5)     |
| Good PG(2.42-3.40)               |           | 331          | (20.1)     |

|                                              |           |      |        |
|----------------------------------------------|-----------|------|--------|
| Moderate I PG(3.42 to 4.4)                   | High risk | 488  | (29.6) |
| Moderate II PG(4.42 to 5.4)                  |           | 395  | (23.9) |
| Poor PG(5.42 to 6.4)                         |           | 170  | (10.3) |
| Very poor PG(6.5–6.8)                        |           | 59   | (3.6)  |
| <b><u>Survival at 20 years</u></b>           | 1650      |      |        |
| Alive and well                               |           | 1055 | (64.0) |
| Dead from disease                            |           | 468  | (28.4) |
| Dead from other causes                       |           | 127  | (7.6)  |
| <b><u>Adjuvant systemic therapy (AT)</u></b> | 1602      |      |        |
| No AT                                        |           | 665  | (42.0) |
| Hormone therapy (HT)                         |           | 642  | (41.0) |
| Chemotherapy                                 |           | 307  | (20.0) |
| Hormone + chemotherapy                       |           | 46   | (3.0)  |

\* Number of cases for which data were available.

NPI; Nottingham prognostic index, PG; prognostic group

**Supplementary Table S4:** Antigens, primary antibodies, clone, source, optimal dilution and scoring system used for each immunohistochemical marker

| Antigen | Antibody                    | Clone      | Source          | Antigen Retrieval | Dilution / Incubation Time | Distribution | Scoring system      | Cut-offs               |
|---------|-----------------------------|------------|-----------------|-------------------|----------------------------|--------------|---------------------|------------------------|
| ER      | Mouse MAb anti-ER- $\alpha$ | SP1        | Dako-Cytomation | Citrate pH6       | 1:150<br>30 min            | Nuclear      | Allred score        | $\geq 3$ (positive)    |
| ER      | Mouse MAb anti-ER- $\alpha$ | EP1        | Dako-Cytomation | Citrate pH6       | 1:80<br>30 min             | Nuclear      | % positive cells    | $\geq 1\%$ positive    |
| PR      | Mouse MAb anti-PR           | PgR636     | Dako-Cytomation | Citrate pH6       | 1:125<br>30 min            | Nuclear      | % positive cells    | $\geq 1\%$ positive    |
| CK14    | Mouse MAb anti-Ck14         | LL002      | Novocastra      | Citrate pH6       | 1:40<br>60 min             | Cytoplasm    | % of positive cells | $\geq 10\%$ (positive) |
| Ck5/6   | Mouse MAb anti-Ck5/6        | D5/161B4   | Dako-Cytomation | EDTA pH8          | 1:100<br>60 min            | Cytoplasm    | % of positive cells | $\geq 10\%$ (positive) |
| Ck17    | Mouse MAb anti-Ck17         | E3         | Dako-Cytomation | Citrate pH6       | 1:100<br>60 min            | Cytoplasm    | % of positive cells | $\geq 10\%$ (positive) |
| Ck18    | Mouse MAb anti-Ck18         | DC10       | Dako-Cytomation | Citrate pH6       | 1:100<br>60 min            | Cytoplasm    | % of positive cells | $\geq 10\%$ (positive) |
| HER2    | Rabbit antihuman c-erbB2    | polyclonal | Dako-Cytomation | None              | 1:400<br>60 min            | Membrane     | See text            | See text               |

All sections were pre-treated with microwave antigen retrieval using 0.1% citrate buffer (pH 6) except for HER2 (no pre-treatment)



**Supplementary Table S5: Clinicopathological significance of WEE1 expression.**

|                                                                                                                | WEE1 expression                                                                |                                                                                | P- value                       | *P -Value (Adjusted) |
|----------------------------------------------------------------------------------------------------------------|--------------------------------------------------------------------------------|--------------------------------------------------------------------------------|--------------------------------|----------------------|
|                                                                                                                | WEE1 -                                                                         | WEE1+                                                                          |                                |                      |
| <b>A) Pathological Parameters</b>                                                                              |                                                                                |                                                                                |                                |                      |
| <b>Tumour Size</b><br><1cm<br>>1-2cm<br>>2-5cm<br>>5cm                                                         | 65 (59.6%)<br>229 (46.9%)<br>155 (42.5%)<br>7 (42.5%)                          | 38 (40.4%)<br>259 (54.1%)<br>210 (57.5%)<br>6 (46.2)                           | <b>0.027</b>                   | <b>0.0330</b>        |
| <b>Tumour Stage</b><br>1<br>2<br>3                                                                             | 286 (47.6%)<br>130 (47.1%)<br>30 (35.7%)                                       | 315 (52.4%)<br>146 (52.9%)<br>54 (64.3%)                                       | 0.119                          | 1.309                |
| <b>Tumour Grade</b><br>G1<br>G2<br>G3                                                                          | 100 (62.5%)<br>169 (58.1%)<br>178 (34.9%)                                      | 60 (37.5%)<br>122 (41.9%)<br>332 (65.1%)                                       | <b>0.00134x10<sup>-8</sup></b> | <b>&lt;0.0001</b>    |
| <b>NPI</b><br>≤ 3.4<br>>3.4                                                                                    | 173 (61.3%)<br>255 (40%)                                                       | 109 (38.7%)<br>382 (60%)                                                       | <b>0.00725x10<sup>-4</sup></b> | <b>&lt;0.0001</b>    |
| <b>Mitotic Index</b><br>M1 (low; mitoses < 10)<br>M2 (medium; mitoses 10-18)<br>M3 (high; mitosis >18)         | 194 (63%)<br>79 (47.6%)<br>156 (34.3%)                                         | 114 (37%)<br>87 (52.4%)<br>299 (65.7%)                                         | <b>0.00411x10<sup>-7</sup></b> | <b>&lt;0.0001</b>    |
| <b>Tubule Formation</b><br>1 (>75% definite tubule)<br>2 (10%-75% definite tubule)<br>3 (<10% definite tubule) | 26 (52%)<br>157 (51%)<br>246 (43.1%)                                           | 24 (48%)<br>151 (49%)<br>325 (56.9%)                                           | <b>0.057</b>                   | <b>0.0627</b>        |
| <b>Pleomorphism</b><br>1 (small-regular uniform)<br>2 (Moderate variation)<br>3 (Marked variation)             | 13 (76.5%)<br>208 (60.1%)<br>207 (36.8%)                                       | 4 (23.5%)<br>138 (39.9%)<br>356 (63.2%)                                        | <b>0.00234x10<sup>-6</sup></b> | <b>&lt;0.0001</b>    |
| <b>Tumour Type</b><br>IDC-NST<br>Tubular<br>Medullary<br>ILC<br>Others<br>Mixed NST & lobular/ special type    | 225 (39.3%)<br>96 (50.5%)<br>4 (17.4%)<br>68 (78.2%)<br>13 (65%)<br>27 (56.3%) | 347 (60.7%)<br>94 (49.5%)<br>19 (82.6%)<br>19 (21.8%)<br>7 (35%)<br>21 (43.8%) | <b>0.00179x10<sup>-5</sup></b> | <b>&lt;0.0001</b>    |
| <b>HER-2 overexpression</b><br>No<br>Yes                                                                       | 402 (49.1%)<br>38 (29.2%)                                                      | 417 (50.9%)<br>92 (70.8%)                                                      | <b>0.000196</b>                | <b>0.0003</b>        |
| <b>ER</b><br>Negative<br>Positive                                                                              | 78 (31.5%)<br>363 (51.9%)                                                      | 170 (68.5%)<br>337 (48.1%)                                                     | <b>0.0042x10<sup>-6</sup></b>  | <b>&lt;0.0001</b>    |
| <b>PR</b><br>Negative<br>Positive                                                                              | 147 (37.5%)<br>284 (52.1%)                                                     | 245 (62.5%)<br>261 (47.9%)                                                     | <b>0.00807x10<sup>-5</sup></b> | <b>&lt;0.0001</b>    |

**Supplementary Table S6: Clinicopathological significance of ATR and XRCC1 expression**

|                                   | ATR and XRCC1 expression |                  |                  |                  | P- value | *P -Value<br>(Adjusted) |
|-----------------------------------|--------------------------|------------------|------------------|------------------|----------|-------------------------|
|                                   | ATR+/<br>XRCC1+          | ATR +/<br>XRCC1- | ATR -/<br>XRCC1+ | ATR -/<br>XRCC1- |          |                         |
| <b>A) Pathological Parameters</b> |                          |                  |                  |                  |          |                         |
| <b>Tumour Size</b>                |                          |                  |                  |                  | 0.385    | 0.4235                  |
| <1cm                              | 12 (33.3%)               | 3 (8.3%)         | 17 (47.2%)       | 4 (11.1%)        |          |                         |
| >1-2cm                            | 87 (38.5%)               | 13 (5.8%)        | 108 (47.8%)      | 18 (8%)          |          |                         |
| >2-5cm                            | 95 (45%)                 | 19 (5.7%)        | 83 (39.3%)       | 14 (6.6%)        |          |                         |
| >5cm                              | 5 (50%)                  | 2 (20%)          | 2(20%)           | 1 (10%)          |          |                         |
| <b>Tumour Stage</b>               |                          |                  |                  |                  | 0.451    | 4.9610                  |
| 1                                 | 120(44.3%)               | 22(8.1%)         | 106(39.1%)       | 23(8.5%)         |          |                         |
| 2                                 | 63(38.2%)                | 12(7.3%)         | 78(47.3%)        | 12(7.3%)         |          |                         |
| 3                                 | 18(36.0%)                | 3(6.0%)          | 27(54.0%)        | 2(4%)            |          |                         |
| <b>Tumour Grade</b>               |                          |                  |                  |                  | 0.00031  | <b>0.0017</b>           |
| G1                                | 23(37.7%)                | 2(3.3%)          | 31(50.8%)        | 5(8.2%)          |          |                         |
| G2                                | 52(35.9%)                | 5(3.4%)          | 84(57.9%)        | 4(2.8%)          |          |                         |
| G3                                | 125(45%)                 | 30(10.8%)        | 95(34.2%)        | 28(10.1%)        |          |                         |
| <b>NPI</b>                        |                          |                  |                  |                  | 0.045    | 0.0707                  |
| ≤ 3.4                             | 42 (36.8%)               | 4 (3.5%)         | 61 (53.5%)       | 7 (6.1%)         |          |                         |
| >3.4                              | 147 (42.5%)              | 31 (9%)          | 139 (40.2%)      | 29 (8.4%)        |          |                         |
| <b>Mitotic Index</b>              |                          |                  |                  |                  | 0.004    | <b>0.0110</b>           |
| M1 (low; mitoses < 10)            | 3(60%)                   | 0(0%)            | 2(40%)           | 0(0%)            |          |                         |
| M2 (medium; mitoses 10-18)        | 55(34%)                  | 7(4.3%)          | 91(56.2%)        | 9(5.6%)          |          |                         |
| M3 (high; mitosis >18)            | 142(45.1%)               | 30(9.5%)         | 115(36.5%)       | 28(8.9%)         |          |                         |
| <b>Tubule Formation</b>           |                          |                  |                  |                  | 0.00000  | <b>0.0001</b>           |
| 1 (>75% definite tubule)          | 8(38.1%)                 | 2(9.5%)          | 9(42.9%)         | 2(9.5%)          |          |                         |
| 2 (10%-75% definite tubule)       | 64(38.3%)                | 84(50.3%)        | 84(50.3%)        | 8(4.8%)          | 7        |                         |
| 3 (<10% definite tubule)          | 128(43.5%)               | 115(39.1%)       | 115(39.1%)       | 27(9.2%)         |          |                         |
| <b>Pleomorphism</b>               |                          |                  |                  |                  | 0.004    | <b>0.0110</b>           |
| 1 (small-regular uniform)         | 3(60%)                   | 0(0%)            | 2(40%)           | 0(0%)            |          |                         |
| 2 (Moderate variation)            | 55(34%)                  | 7(4.3%)          | 91(56.2%)        | 9(5.6%)          |          |                         |
| 3 (Marked variation)              | 142(45.1%)               | 30(9.5%)         | 115(36.5%)       | 28(8.9%)         |          |                         |
| <b>Tumour Type</b>                |                          |                  |                  |                  | 0.168    | 0.2310                  |
| IDC-NST                           | 134 (42.4%)              | 29 (9.2%)        | 129 (40.8%)      | 24 (7.6%)        |          |                         |
| Tubular                           | 33 (38.4%)               | 6 (7%)           | 40 (46.5%)       | 7 (8.1%)         |          |                         |
| Medullary                         | 3(33.3%)                 | 0 (0%)           | 3 (33.3%)        | 3 (33.3%)        |          |                         |
| ILC                               | 13 (38.2%)               | 1 (2.9%)         | 20 (58.8%)       | 0 (0%)           |          |                         |
| Others                            | 1 (33.3%)                | 0 (0%)           | 1 (33.3%)        | 1 (33.3%)        |          |                         |
| Mixed NST & Lobular/special type  | 12 (40%)                 | 1 (3.3%)         | 15 (50%)         | 2 (6.7%)         |          |                         |
| <b>Her2 overexpression</b>        |                          |                  |                  |                  | 0.310    | 0.3789                  |
| No                                | 159 (39.7%)              | 32 (8%)          | 181(45.1%)       | 29 (7.2%)        |          |                         |
| Yes                               | 39 (49.4%)               | 6 (7.6%)         | 27 (34.2%)       | 7 (8.9%)         |          |                         |
| <b>ER status</b>                  |                          |                  |                  |                  | 0.011    | <b>0.0202</b>           |
| Negative                          | 48 (41.4 %)              | 16 (13.8%)       | 40 (34.5%)       | 12(10.3%)        |          |                         |
| Positive                          | 151 (41.7%)              | 22 (6.1%)        | 166 (45.9%)      | 23 (6.4%)        |          |                         |
| <b>PR</b>                         |                          |                  |                  |                  | 0.002    | <b>0.0073</b>           |
| Negative                          | 71 (38.8%)               | 24 (13.1%)       | 70(38.3%)        | 18 (9.3%)        |          |                         |
| Positive                          | 120 (43.2%)              | 13 (4.7%)        | 130 (46.8%)      | 15(5.4%)         |          |                         |

**Supplementary Table S7:** Clinicopathological significance of ATM and XRCC1 expression

|                                   | ATM and XRCC1 expression |              |              |              | P- value                   | *P - Value (Adjusted) |
|-----------------------------------|--------------------------|--------------|--------------|--------------|----------------------------|-----------------------|
|                                   | ATM+/XRCC1+              | ATM +/XRCC1- | ATM -/XRCC1+ | ATM -/XRCC1- |                            |                       |
| <b>A) Pathological Parameters</b> |                          |              |              |              |                            |                       |
| <b>Tumour Size</b>                |                          |              |              |              | 0.174                      | <b>0.4785</b>         |
| <1cm                              | 29 (40.3%)               | 5 (6.9%)     | 30 (41.7%)   | 8 (11.1%)    |                            |                       |
| >1-2cm                            | 198 (46.8%)              | 22 (5.2%)    | 169 (40%)    | 34 (8%)      |                            |                       |
| >2-5cm                            | 102 (36.2%)              | 16 (5.7%)    | 128 (45.4%)  | 36 (12.8%)   |                            |                       |
| >5cm                              | 3 (25%)                  | 0 (0%)       | 7 (58.3%)    | 2 (16.7%)    |                            |                       |
| <b>Tumour Stage</b>               |                          |              |              |              | 0.046                      | <b>0.1687</b>         |
| 1                                 | 220(45.6%)               | 28(5.8%)     | 194(40.2%)   | 40(8.3%)     |                            |                       |
| 2                                 | 91(37.9%)                | 13(5.4%)     | 104(43.0%)   | 34(14%)      |                            |                       |
| 3                                 | 22(33.3%)                | 2(3%)        | 36(54.5%)    | 6(9.1%)      |                            |                       |
| <b>Tumour Grade</b>               |                          |              |              |              | 1.539 X 10 <sup>-13</sup>  | <b>&lt;0.0001</b>     |
| G1                                | 79(64.2%)                | 7(5.7%)      | 35(28.5%)    | 2(1.6%)      |                            |                       |
| G2                                | 123(46.1%)               | 4(1.5%)      | 127(47.6%)   | 13(4.9%)     |                            |                       |
| G3                                | 131(32.8%)               | 32(8%)       | 172(43%)     | 65(16.3%)    |                            |                       |
| <b>NPI</b>                        |                          |              |              |              | 1.7958 X 10 <sup>-7</sup>  | <b>&lt;0.0001</b>     |
| ≤ 3.4                             | 127 (55.9%)              | 8 (3.5%)     | 85 (37.4%)   | 7 (3.1%)     |                            |                       |
| >3.4                              | 194 (36.5%)              | 33 (6.2%)    | 233 (43.9%)  | 71 (13.4%)   |                            |                       |
| <b>Mitotic Index</b>              |                          |              |              |              | 8.3X10 <sup>-10</sup>      | <b>&lt;0.0001</b>     |
| M1 (low; mitoses < 10)            | 144(54.5%)               | 8(3%)        | 105(39.8%)   | 7(2.7%)      |                            |                       |
| M2 (medium; mitoses 10-18)        | 66(44.3%)                | 5(3.4%)      | 62(41.6%)    | 16(10.7%)    |                            |                       |
| M3 (high; mitosis >18)            | 116(32.1%)               | 30(8.3%)     | 158(43.8%)   | 57(15.8%)    |                            |                       |
| <b>Tubule Formation</b>           |                          |              |              |              | 4.3 X10 <sup>-17</sup>     | <b>&lt;0.0001</b>     |
| 1 (>75% definite tubule)          | 15(41.7%)                | 5(13.9%)     | 16(44.4%)    | 0(0%)        |                            |                       |
| 2 (10%-75% definite tubule)       | 144(54.5%)               | 6(2.3%)      | 97(36.7%)    | 17(6.4%)     |                            |                       |
| 3 (<10% definite tubule)          | 167(35.2%)               | 32(6.8%)     | 212(44.7%)   | 63(13.3%)    |                            |                       |
| <b>Pleomorphism</b>               |                          |              |              |              | 0.0000 07                  | <b>&lt;0.0001</b>     |
| 1 (small-regular uniform)         | 10(55.6%)                | 2(11.1%)     | 6(33.3%)     | 0(0%)        |                            |                       |
| 2 (Moderate variation)            | 149(49.7%)               | 9(3%)        | 128(42.7%)   | 14(4.7%)     |                            |                       |
| 3 (Marked variation)              | 165(36.4%)               | 32(7.1%)     | 190(41.9%)   | 66(14.6%)    |                            |                       |
| <b>Tumour Type</b>                |                          |              |              |              | 0.0000 06                  | <b>0.0001</b>         |
| IDC-NST                           | 183 (38.1%)              | 27 (5.6%)    | 208 (43.3%)  | 62 (12.9%)   |                            |                       |
| Tubular                           | 87 (56.5%)               | 8 (5.2%)     | 54 (35.1%)   | 5 (3.2%)     |                            |                       |
| Medullary                         | 7 (28%)                  | 3 (12%)      | 7 (28%)      | 8 (32%)      |                            |                       |
| ILC                               | 25 (35.7%)               | 2 (2.9%)     | 41 (58.6%)   | 2 (2.9%)     |                            |                       |
| Others                            | 3 (37.5%)                | 0 (0%)       | 5 (62.5%)    | 0 (0%)       |                            |                       |
| Mixed NST & Lobular/special type  | 24 (51.1%)               | 3 (6.4%)     | 17 (36.2%)   | 3 (6.4%)     |                            |                       |
| <b>Her2 overexpression</b>        |                          |              |              |              | 0.176                      | <b>0.4785</b>         |
| No                                | 293 (43.7%)              | 35 (5.2%)    | 276 (41.2%)  | 66 (9.9%)    |                            |                       |
| Yes                               | 35 (32.4%)               | 7 (6.5%)     | 54 (50%)     | 12 (11.1%)   |                            |                       |
| <b>ER status</b>                  |                          |              |              |              | 8.318 X 10 <sup>-13</sup>  | <b>&lt;0.0001</b>     |
| Negative                          | 61 (28.8%)               | 20 (9.4%)    | 86 (40.6%)   | 45 (21.2%)   |                            |                       |
| Positive                          | 270 (47.6%)              | 21 (3.7%)    | 243 (42.9%)  | 33 (5.8%)    |                            |                       |
| <b>PR</b>                         |                          |              |              |              | 3.0047 X 10 <sup>-11</sup> | <b>&lt;0.0001</b>     |
| Negative                          | 103 (32.5%)              | 24 (7.6%)    | 133 (42%)    | 57 (18%)     |                            |                       |
| Positive                          | 219 (49.2%)              | 15 (3.4%)    | 191 (42.9%)  | 20 (4.5%)    |                            |                       |

**Supplementary Table S8: Clinicopathological significance of WEE1 expression and XRCC1.**

|                                   | WEE1 and XRCC1 expression |                  |                  |                  | P- value                      | *P -Value (Adjusted) |
|-----------------------------------|---------------------------|------------------|------------------|------------------|-------------------------------|----------------------|
|                                   | WEE1+/<br>XRCC1+          | WEE1+/<br>XRCC1- | WEE1-/<br>XRCC1+ | WEE1-/<br>XRCC1- |                               |                      |
| <b>A) Pathological Parameters</b> |                           |                  |                  |                  |                               |                      |
| <b>Tumour Size</b>                |                           |                  |                  |                  |                               |                      |
| <1cm                              | 20 (35.1%)                | 3 (5.3%)         | 28 (49.1%)       | 5 (10.5%)        | 0.138                         | 0.7590               |
| >1-2cm                            | 172 (48%)                 | 33 (9.2%)        | 130 (36.3%)      | 23 (6.4%)        |                               |                      |
| >2-5cm                            | 127 (45.7%)               | 35 (12.6%)       | 92 (33.1%)       | 24 (8.6%)        |                               |                      |
| >5cm                              | 2 (18.2%)                 | 2 (18.2%)        | 6 (54.5%)        | 1 (9.1%)         |                               |                      |
| <b>Tumour Stage</b>               |                           |                  |                  |                  |                               |                      |
| 1                                 | 194 (45.6%)               | 41 (9.6%)        | 159 (37.4%)      | 31 (7.3%)        | 0.292                         | 0.803                |
| 2                                 | 89 (41.8%)                | 28 (13.1%)       | 80 (37.6%)       | 16 (7.5%)        |                               |                      |
| 3                                 | 39 (57.4%)                | 5 (7.4%)         | 18 (26.5%)       | 6 (8.8%)         |                               |                      |
| <b>Tumour Grade</b>               |                           |                  |                  |                  |                               |                      |
| G1                                | 37 (34.3%)                | 7 (6.5%)         | 57 (52.8%)       | 7 (6.5%)         | 7.45 X<br>10 <sup>-7</sup>    | <0.0001              |
| G2                                | 80 (38.1%)                | 8 (3.8%)         | 111 (52.9%)      | 11 (5.2%)        |                               |                      |
| G3                                | 205 (53%)                 | 58 (15%)         | 88 (22.7%)       | 36 (9.3%)        |                               |                      |
| <b>NPI</b>                        |                           |                  |                  |                  |                               |                      |
| ≤ 3.4                             | 67 (34.5%)                | 11 (5.7%)        | 106 (54.6%)      | 10 (5.2%)        | 7.25 X<br>10 <sup>-9</sup>    | <0.0001              |
| >3.4                              | 240 (49.9%)               | 60 (12.5%)       | 139 (28.9%)      | 42 (8.7%)        |                               |                      |
| <b>Mitotic Index</b>              |                           |                  |                  |                  |                               |                      |
| M1 (low; mitoses < 10)            | 73 (34.9%)                | 9 (4.3%)         | 115 (55%)        | 12 (5.7%)        | 4.0115 X<br>10 <sup>-12</sup> | <0.0001              |
| M2 (medium; mitoses 10-18)        | 46 (43.1%)                | 11 (8.5%)        | 50 (38.5%)       | 13 (10%)         |                               |                      |
| M3 (high; mitosis >18)            | 185 (53.8%)               | 52 (15.1%)       | 79 (23%)         | 28 (8.1%)        |                               |                      |
| <b>Tubule Formation</b>           |                           |                  |                  |                  |                               |                      |
| 1 (>75% definite tubule)          | 15 (46.9%)                | 2 (6.3%)         | 12 (37.5%)       | 3 (9.4%)         | 0.171                         | 0.6270               |
| 2 (10%-75% definite tubule)       | 103 (45.2%)               | 16 (7.5)         | 4 (41.2%)        | 15 (6.6%)        |                               |                      |
| 3 (<10% definite tubule)          | 196 (46.3%)               | 54 (12.3%)       | 138 (32.6%)      | 35 (8.3%)        |                               |                      |
| <b>Pleomorphism</b>               |                           |                  |                  |                  |                               |                      |
| 1 (small-regular uniform)         | 3 (30 %)                  | 0 (0 %)          | 6 (60%)          | 1 (10%)          | 2.333 X<br>10 <sup>-11</sup>  | <0.0001              |
| 2 (Moderate variation)            | 90 (35.9%)                | 11 (4.4%)        | 132 (52.6%)      | 18 (7.2%)        |                               |                      |
| 3 (Marked variation)              | 219 (52.3%)               | 61 (14.6%)       | 105 (25.1%)      | 34 (8.1%)        |                               |                      |
| <b>Tumour Type</b>                |                           |                  |                  |                  |                               |                      |
| IDC-NST                           | 218 (50.3%)               | 50 (11.5%)       | 125 (28.9%)      | 40 (9.2%)        | 01.79x1<br>0 <sup>-10</sup>   | <0.0001              |
| Tubular                           | 62 (47.3%)                | 10 (7.6%)        | 52 (39.7%)       | 7 (5.3%)         |                               |                      |
| Medullary                         | 9 (45%)                   | 7 (35%)          | 2 (10%)          | 2 (10%)          |                               |                      |
| ILC                               | 10 (16.7%)                | 2 (3.3%)         | 47 (78.3%)       | 1 (1.7%)         |                               |                      |
| Others                            | 2 (25%)                   | 1 (12.5%)        | 4 (50 %)         | 1 (12.5%)        |                               |                      |
| Mixed NST & Lobular/special type  | 15 (38.5%)                | 3 (7.7%)         | 18 (46.2%)       | 3 (7.7%)         |                               |                      |
| <b>Her2 overexpression</b>        |                           |                  |                  |                  |                               |                      |
| No                                | 258 (42.6%)               | 64 (10.6%)       | 239 (39.4%)      | 45 (7.4%)        | 0.00196                       | 0.0216               |
| Yes                               | 61 (64.2%)                | 8 (8.4%)         | 17 (17.9%)       | 9 (9.5%)         |                               |                      |
| <b>ER status</b>                  |                           |                  |                  |                  |                               |                      |
| Negative                          | 89 (48.4%)                | 41 (22.3%)       | 38 (20.7%)       | 16 (8.6%)        | 4.1958 X<br>10 <sup>-11</sup> | <0.0001              |
| Positive                          | 228 (44.5%)               | 32 (6.3%)        | 216 (42.2%)      | 36 (7%)          |                               |                      |
| <b>PR</b>                         |                           |                  |                  |                  |                               |                      |
| Negative                          | 139 (47.9%)               | 53 (18.3%)       | 75 (25.5%)       | 24 (8.3%)        | 8.0747 X<br>10 <sup>-10</sup> | <0.0001              |
| Positive                          | 176 (43.7%)               | 21 (5.2%)        | 180 (44.7%)      | 26 (6.5%)        |                               |                      |

**Supplementary Table S9:** Correlation between XRCC1 and BRCA1 in sporadic breast cancers.

|                       | <b>Low XRCC1</b> | <b>High XRCC1</b> | <b>P-Value</b> |
|-----------------------|------------------|-------------------|----------------|
| <b>BRCA1 Negative</b> | 105 (23.0%)      | 352(77.0%)        | 0.0001         |
| <b>BRCA1 Positive</b> | 63 (11%)         | 509 (89%)         |                |
| <b>Total (n=1029)</b> | 168 (16.3%)      | 861 (87.3%)       |                |

## **Supplementary Figure Legends:**

**Supplementary Figure S1:** (A) Western blot of ATR and XRCC1 levels in HeLa control, HeLa XRCC1\_KD, 231 control, 231 (XRCC1\_KO) and 157 cells. (B) Clonogenic survival assay for AZD6738 monotherapy in 231 control, 231 (XRCC1\_KO), 157 cells, HeLa control and HeLa XRCC1\_KD cells. (C) Western blot of ATM levels in 231 control, 231 (XRCC1\_KO), 157 cells, HeLa control and HeLa XRCC1\_KD cells. (D) Clonogenic survival assay for AZ31 monotherapy in 231 control, 231 (XRCC1\_KO), 157 cells, HeLa control and HeLa XRCC1\_KD cells. (E) Western blot of WEE1 levels in 231 control, 231 (XRCC1\_KO), 157 cells, HeLa control and HeLa XRCC1\_KD cells. (F) Clonogenic survival assay for AZD1775 monotherapy in 231 control, 231 (XRCC1\_KO), 157 cells, HeLa control and HeLa XRCC1\_KD cells. (G) Quantification of basal  $\gamma$ H2AX levels by flow cytometry in 231 control, 231 (XRCC1\_KO) and 157 cells. (H) Quantification of basal  $\gamma$ H2AX levels by flow cytometry in HeLa control and HeLa XRCC1\_KD cells

**Supplementary Figure S2:** Kaplan Meier curves for WEE1 protein expression showing breast cancer specific survival (BCSS).

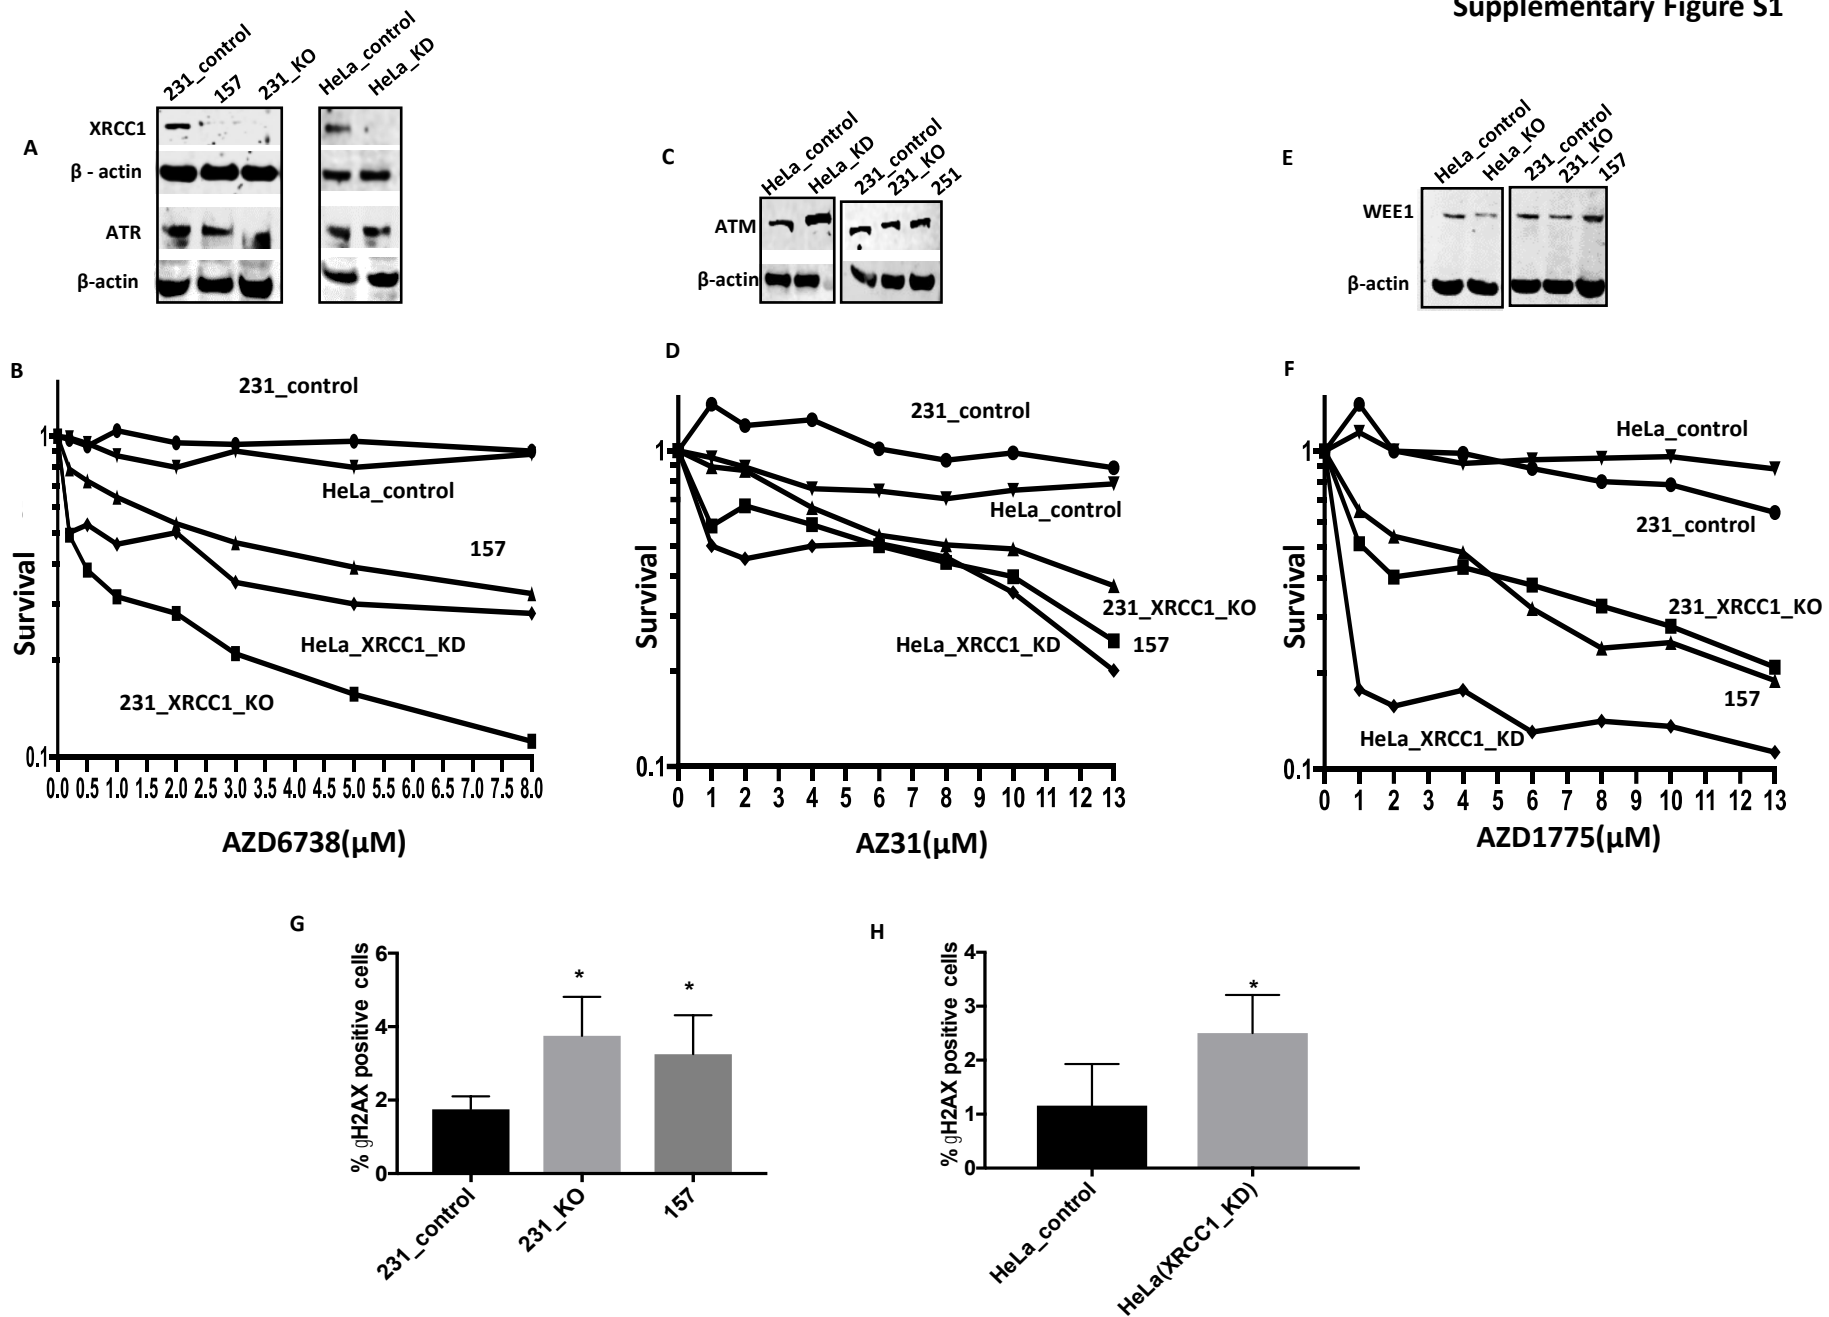

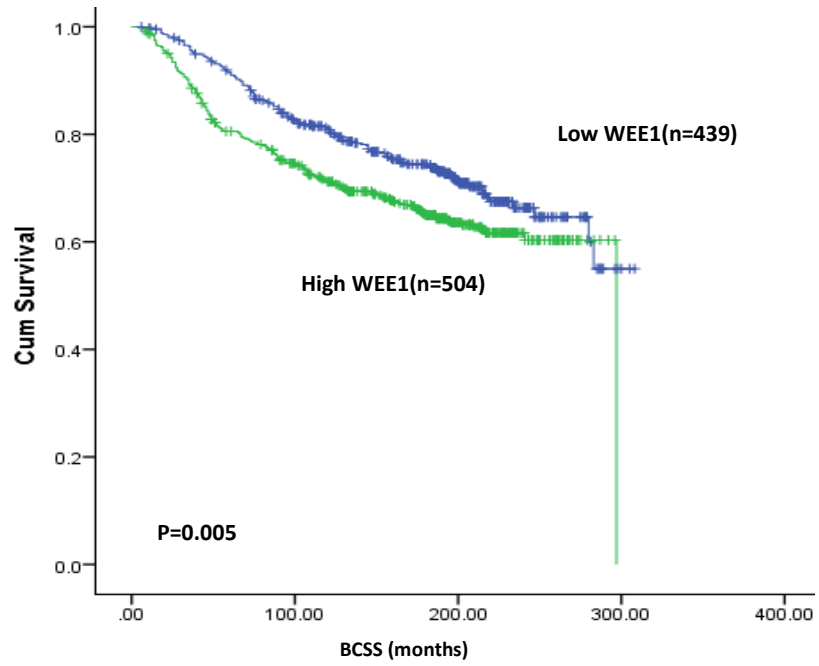

Supplement: sj-pdf-1-tam-10.1177_1758835920974201.pdf [file sj-pdf-1-tam-10.1177_1758835920974201.pdf]
